# Supplementary material
Source: Elsevier journal article supplement (https://www.sciencedirect.com/science/article/pii/S0325754120300936)

**Figure 1E.** The effect of temperature and water activity on the predicted probability of *E. amstelodami* growth on a feed matrix for (a) 7, (b) 15 and (c) 40days.

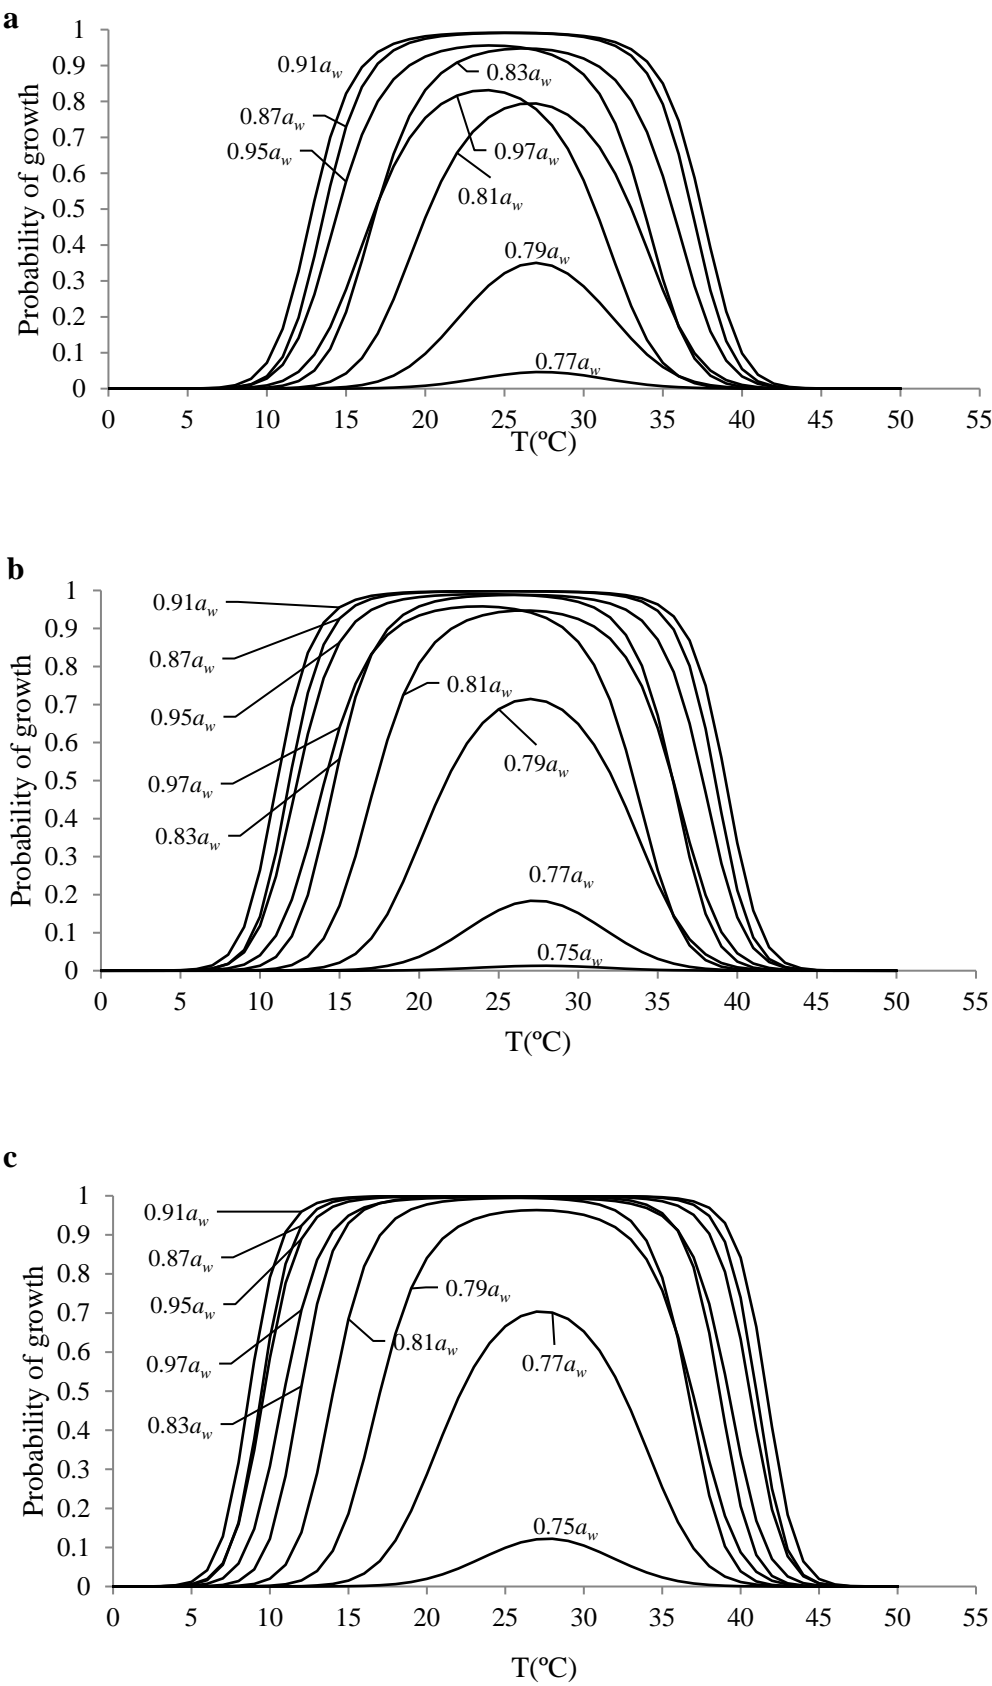

**Figure 2E.** The effect of temperature and water activity on the predicted probability of *E. chevalieri* growth on a feed matrix for (a) 7, (b) 15 and (c) 40 days.

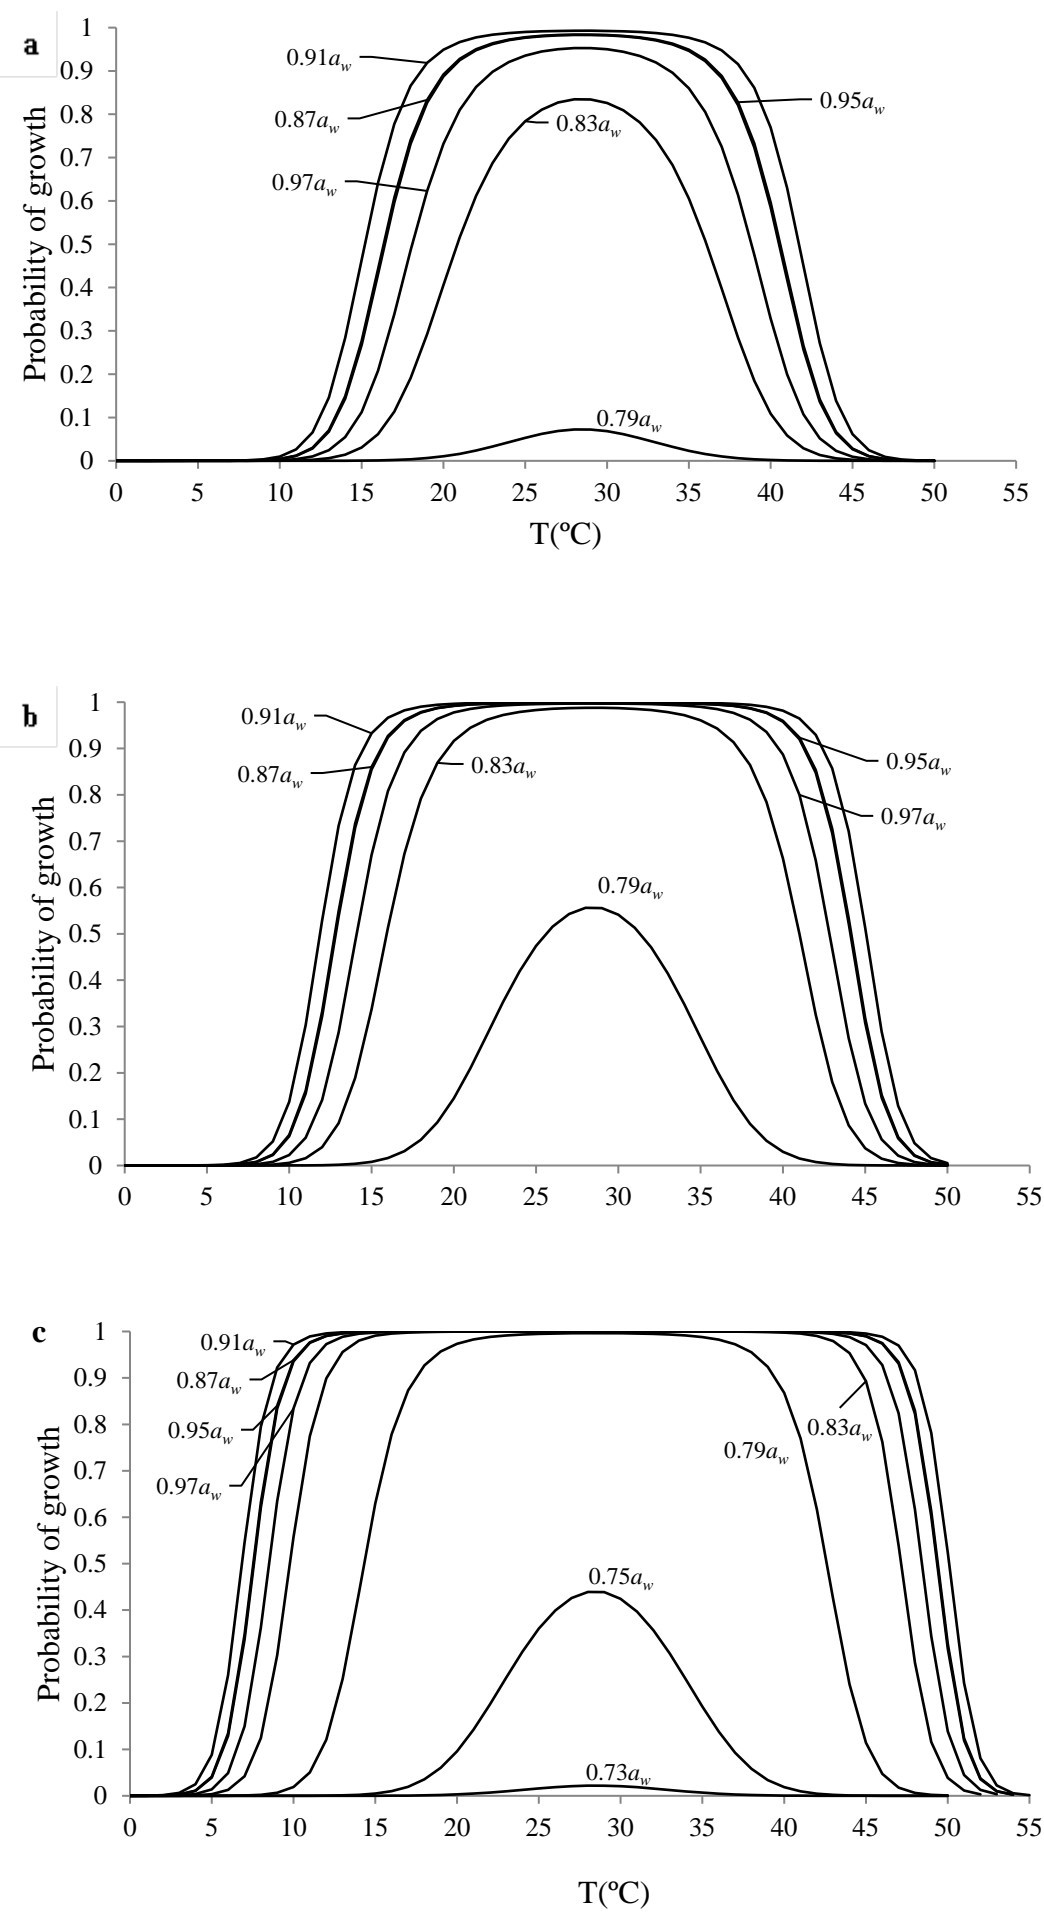

**Figure 3E.** The effect of temperature and water activity on the predicted probability of *E. repens* growth on a feed matrix for (a) 7, (b) 15 and (c) 40 days.

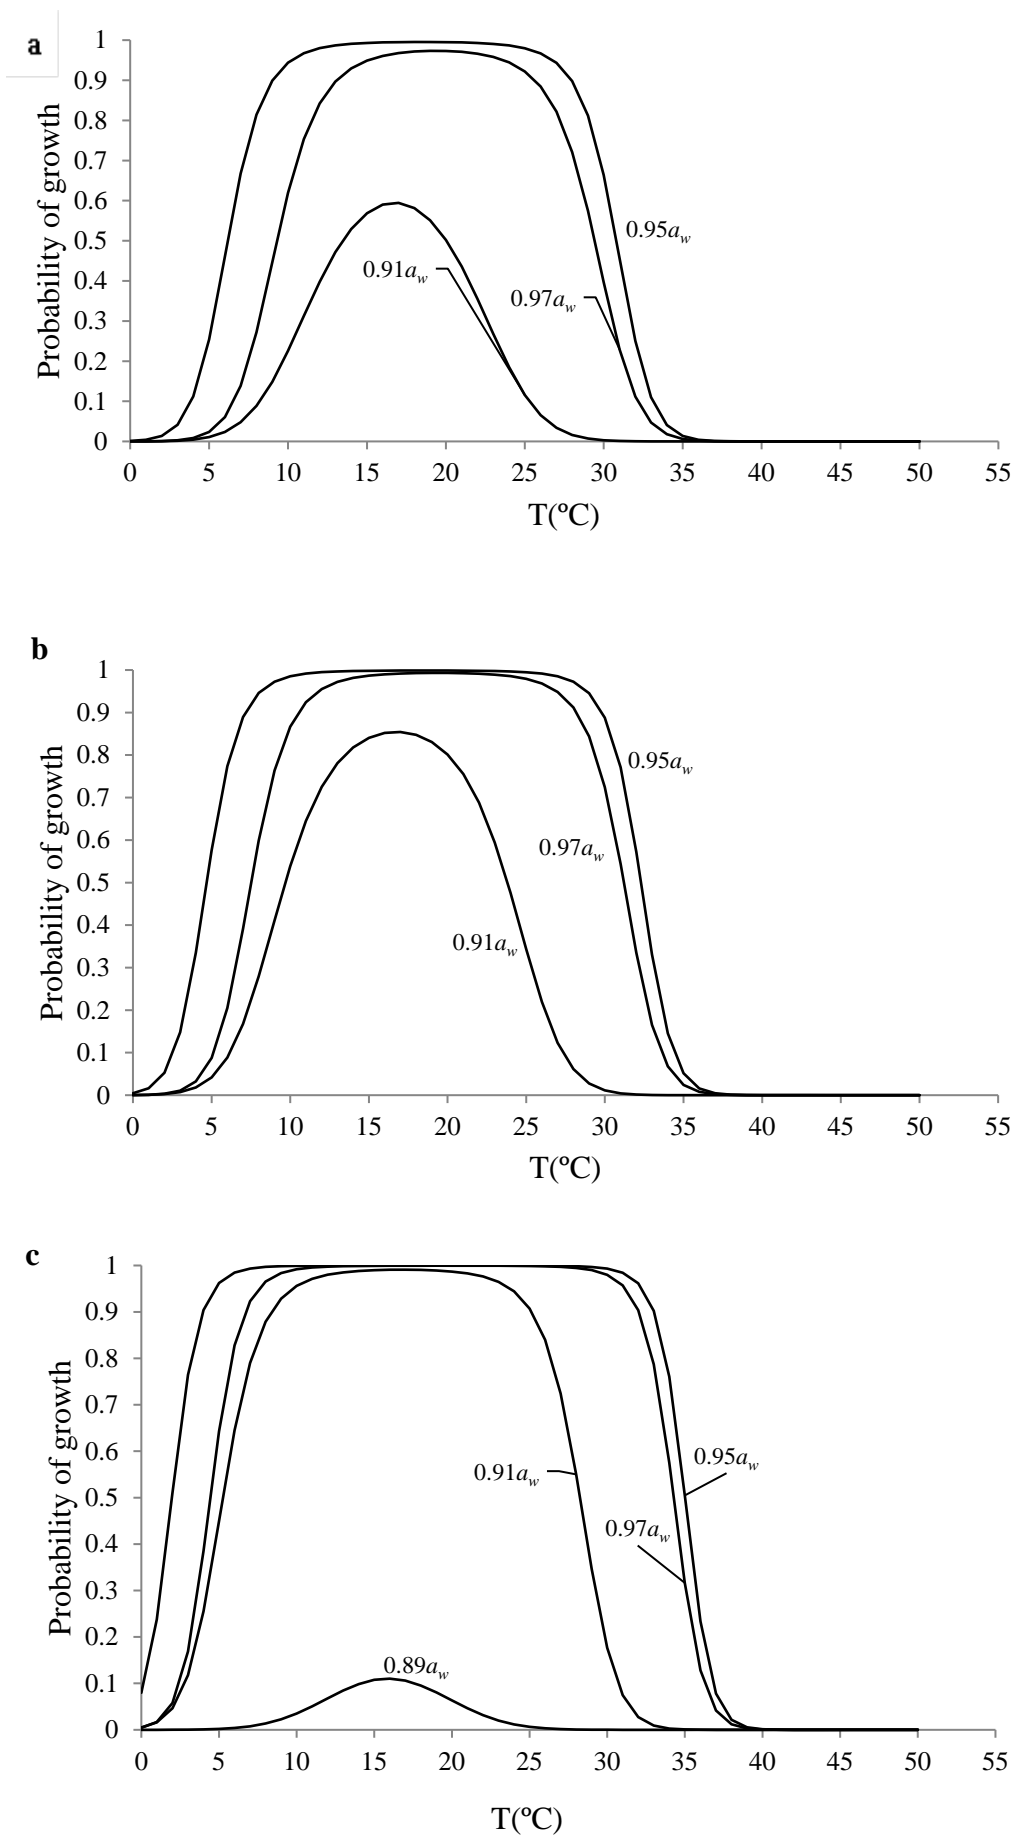

**Figure 4E.** The effect of temperature and water activity on the predicted probability of *E. rubrum* growth on a feed matrix for (a) 7, (b) 15 and (c) 40 days.

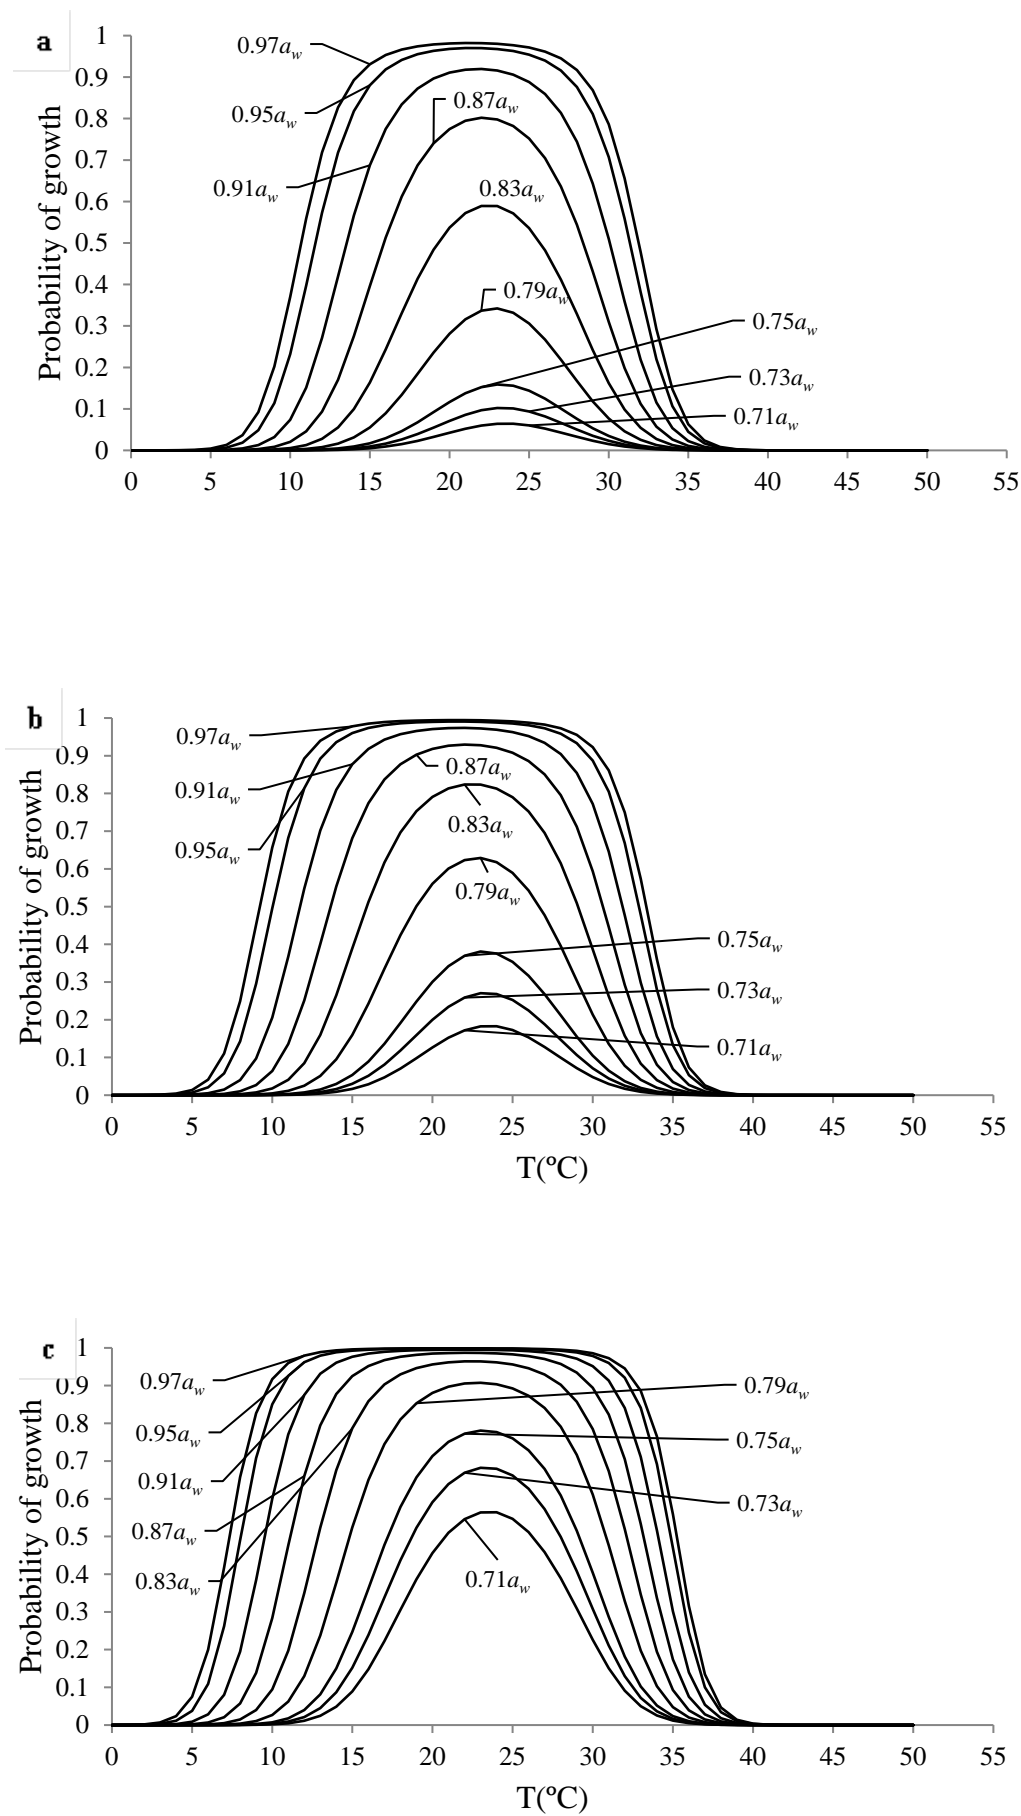

Supplement: mmc1 [file S0325754120300936:mmc1.pdf]
